# Supplementary material
Source: MDPI journal article supplement (https://www.mdpi.com/1424-8247/15/9/1117)
Supplement: s1 [file s1]

**Supplementary Material for**

# **Terpenes and Cannabinoids in Supercritical CO<sub>2</sub> Extracts of Industrial Hemp Inflorescences: Optimization of Extraction, Antiradical and Antibacterial Activity**

**Stela Jokić<sup>1</sup>, Igor Jerković<sup>2\*</sup>, Valentina Pavić<sup>3</sup>, Krunoslav Aladić<sup>1</sup>, Maja Molnar<sup>1</sup>, Martina Jakovljević Kovač<sup>1</sup> and Sanda Vladimir-Knežević<sup>4</sup>**

<sup>1</sup> Faculty of Food Technology, Josip Juraj Strossmayer University of Osijek, Franje Kuhača 18, 31000 Osijek, Croatia

<sup>4</sup> Faculty of Chemistry and Technology, University of Split, Ruđera Boškovića 35, 21000 Split, Croatia

<sup>3</sup> Department of Biology, Josip Juraj Strossmayer University of Osijek, Cara Hadrijana 8/A, 31000 Osijek, Croatia

<sup>4</sup> Faculty of Pharmacy and Biochemistry, University of Zagreb, A. Kovačića 1, 10000 Zagreb, Croatia

\* Correspondence: igor@ktf-split.hr; Tel.: +385-21-329-461

## Content of listed material

**Table S1.** Analysis of variance (ANOVA) for the response surface quadratic models for extraction yield.

| Source                        | Sum of squares | df | Mean square | F-value | <i>p</i> -value* |
|-------------------------------|----------------|----|-------------|---------|------------------|
| <i>Extraction yield</i>       |                |    |             |         |                  |
| Model                         | 60.50          | 5  | 12.10       | 104.76  | < 0.0001         |
| X <sub>1</sub>                | 54.33          | 1  | 54.33       | 470.38  | < 0.0001         |
| X <sub>2</sub>                | 0.9855         | 1  | 0.9855      | 8.53    | 0.0223           |
| X <sub>1</sub> <sup>2</sup>   | 3.15           | 1  | 3.15        | 27.31   | 0.0012           |
| X <sub>2</sub> <sup>2</sup>   | 1.77           | 1  | 1.77        | 15.32   | 0.0058           |
| X <sub>1</sub> X <sub>2</sub> | 0.1119         | 1  | 0.1119      | 0.9685  | 0.3578           |
| Residual                      | 0.8085         | 7  | 0.1155      |         |                  |
| Lack of fit                   | 0.6647         | 3  | 0.2216      | 6.16    | 0.0557           |
| Pure error                    | 0.1439         | 4  | 0.0360      |         |                  |
| Cor total                     | 61.31          | 12 |             |         |                  |
| R <sup>2</sup> =0.9868        |                |    |             |         |                  |

\* X<sub>1</sub>: extraction pressure; X<sub>2</sub>: temperature

*p* ≥ 0.05 not significant.

**Table S2.** Analysis of variance (ANOVA) for the response surface quadratic models for selected terpenes.

| Source                        | Sum of squares | df | Mean square | F-value | <i>p</i> -value* |
|-------------------------------|----------------|----|-------------|---------|------------------|
| <i>α-Pinene</i>               |                |    |             |         |                  |
| Model                         | 51.80          | 5  | 10.36       | 9.47    | 0.0051           |
| X <sub>1</sub>                | 30.64          | 1  | 30.64       | 28.00   | 0.0011           |
| X <sub>2</sub>                | 0.9380         | 1  | 0.9380      | 0.8573  | 0.3853           |
| X <sub>1</sub> <sup>2</sup>   | 1.65           | 1  | 1.65        | 1.51    | 0.2589           |
| X <sub>2</sub> <sup>2</sup>   | 18.45          | 1  | 18.45       | 16.87   | 0.0045           |
| X <sub>1</sub> X <sub>2</sub> | 0.8101         | 1  | 0.8101      | 0.7405  | 0.4180           |
| Residual                      | 7.66           | 7  | 1.09        |         |                  |
| Lack of fit                   | 6.12           | 3  | 2.04        | 5.32    | 0.0701           |
| Pure error                    | 1.54           | 4  | 0.3839      |         |                  |
| Cor total                     | 59.46          | 12 |             |         |                  |
| R <sup>2</sup> =0.8712        |                |    |             |         |                  |
| <i>β-Pinene</i>               |                |    |             |         |                  |
| Model                         | 22.95          | 5  | 4.59        | 18.42   | 0.0007           |
| X <sub>1</sub>                | 15.44          | 1  | 15.44       | 61.96   | 0.0001           |
| X <sub>2</sub>                | 0.1507         | 1  | 0.1507      | 0.6045  | 0.4623           |
| X <sub>1</sub> <sup>2</sup>   | 0.3782         | 1  | 0.3782      | 1.52    | 0.2578           |
| X <sub>2</sub> <sup>2</sup>   | 6.94           | 1  | 6.94        | 27.86   | 0.0012           |
| X <sub>1</sub> X <sub>2</sub> | 0.0222         | 1  | 0.0222      | 0.0891  | 0.7740           |
| Residual                      | 1.74           | 7  | 0.2492      |         |                  |
| Lack of fit                   | 1.25           | 3  | 0.4178      | 3.40    | 0.1338           |
| Pure error                    | 0.4911         | 4  | 0.1228      |         |                  |
| Cor total                     | 24.70          | 12 |             |         |                  |
| R <sup>2</sup> =0.9294        |                |    |             |         |                  |
| <i>β-Myrcene</i>              |                |    |             |         |                  |
| Model                         | 220.57         | 5  | 44.11       | 4.27    | 0.0421           |
| X <sub>1</sub>                | 110.96         | 1  | 110.96      | 10.75   | 0.0135           |
| X <sub>2</sub>                | 0.2220         | 1  | 0.2220      | 0.0215  | 0.8875           |
| X <sub>1</sub> <sup>2</sup>   | 22.37          | 1  | 22.37       | 2.17    | 0.1845           |
| X <sub>2</sub> <sup>2</sup>   | 87.01          | 1  | 87.01       | 8.43    | 0.0229           |
| X <sub>1</sub> X <sub>2</sub> | 1.50           | 1  | 1.50        | 0.1452  | 0.7145           |
| Residual                      | 72.27          | 7  | 10.32       |         |                  |
| Lack of fit                   | 54.63          | 3  | 18.21       | 4.13    | 0.1022           |
| Pure error                    | 17.64          | 4  | 4.41        |         |                  |
| Cor total                     | 292.84         | 12 |             |         |                  |
| R <sup>2</sup> =0.7532        |                |    |             |         |                  |
| <i>Limonene</i>               |                |    |             |         |                  |
| Model                         | 16.12          | 5  | 3.22        | 19.88   | 0.0005           |
| X <sub>1</sub>                | 12.02          | 1  | 12.02       | 74.12   | < 0.0001         |
| X <sub>2</sub>                | 0.0438         | 1  | 0.0438      | 0.2701  | 0.6193           |
| X <sub>1</sub> <sup>2</sup>   | 0.4160         | 1  | 0.4160      | 2.56    | 0.1533           |
| X <sub>2</sub> <sup>2</sup>   | 3.59           | 1  | 3.59        | 22.13   | 0.0022           |
| X <sub>1</sub> X <sub>2</sub> | 0.0005         | 1  | 0.0005      | 0.0030  | 0.9578           |
| Residual                      | 1.14           | 7  | 0.1622      |         |                  |

|                               |        |    |        |        |        |
|-------------------------------|--------|----|--------|--------|--------|
| Lack of fit                   | 0.4926 | 3  | 0.1642 | 1.02   | 0.4716 |
| Pure error                    | 0.6429 | 4  | 0.1607 |        |        |
| Cor total                     | 17.26  | 12 |        |        |        |
| R <sup>2</sup> =0.9342        |        |    |        |        |        |
| <i>β -Caryophyllene</i>       |        |    |        |        |        |
| Model                         | 41.60  | 5  | 8.32   | 6.02   | 0.0178 |
| X <sub>1</sub>                | 6.11   | 1  | 6.11   | 4.42   | 0.0736 |
| X <sub>2</sub>                | 5.98   | 1  | 5.98   | 4.33   | 0.0759 |
| X <sub>1</sub> <sup>2</sup>   | 13.88  | 1  | 13.88  | 10.04  | 0.0157 |
| X <sub>2</sub> <sup>2</sup>   | 15.62  | 1  | 15.62  | 11.31  | 0.0120 |
| X <sub>1</sub> X <sub>2</sub> | 0.1693 | 1  | 0.1693 | 0.1226 | 0.7366 |
| Residual                      | 9.67   | 7  | 1.38   |        |        |
| Lack of fit                   | 6.56   | 3  | 2.19   | 2.81   | 0.1721 |
| Pure error                    | 3.11   | 4  | 0.7785 |        |        |
| Cor total                     | 51.27  | 12 |        |        |        |
| R <sup>2</sup> =0.8114        |        |    |        |        |        |
| <i>Guaiol</i>                 |        |    |        |        |        |
| Model                         | 14.69  | 5  | 2.94   | 8.57   | 0.0068 |
| X <sub>1</sub>                | 11.16  | 1  | 11.16  | 32.55  | 0.0007 |
| X <sub>2</sub>                | 0.0197 | 1  | 0.0197 | 0.0576 | 0.8172 |
| X <sub>1</sub> <sup>2</sup>   | 0.1190 | 1  | 0.1190 | 0.3472 | 0.5742 |
| X <sub>2</sub> <sup>2</sup>   | 2.82   | 1  | 2.82   | 8.22   | 0.0241 |
| X <sub>1</sub> X <sub>2</sub> | 0.9472 | 1  | 0.9472 | 2.76   | 0.1404 |
| Residual                      | 2.40   | 7  | 0.3428 |        |        |
| Lack of fit                   | 1.96   | 3  | 0.6547 | 6.01   | 0.0579 |
| Pure error                    | 0.4355 | 4  | 0.1089 |        |        |
| Cor total                     | 17.09  | 12 |        |        |        |
| R <sup>2</sup> =0.8596        |        |    |        |        |        |
| <i>γ-Eudesmol</i>             |        |    |        |        |        |
| Model                         | 15.69  | 5  | 3.14   | 6.29   | 0.0159 |
| X <sub>1</sub>                | 12.08  | 1  | 12.08  | 24.23  | 0.0017 |
| X <sub>2</sub>                | 0.0676 | 1  | 0.0676 | 0.1356 | 0.7236 |
| X <sub>1</sub> <sup>2</sup>   | 0.1332 | 1  | 0.1332 | 0.2671 | 0.6212 |
| X <sub>2</sub> <sup>2</sup>   | 2.59   | 1  | 2.59   | 5.19   | 0.0567 |
| X <sub>1</sub> X <sub>2</sub> | 1.23   | 1  | 1.23   | 2.46   | 0.1606 |
| Residual                      | 3.49   | 7  | 0.4987 |        |        |
| Lack of fit                   | 2.85   | 3  | 0.9499 | 5.93   | 0.0592 |
| Pure error                    | 0.6411 | 4  | 0.1603 |        |        |
| Cor total                     | 19.18  | 12 |        |        |        |
| R <sup>2</sup> =0.8180        |        |    |        |        |        |
| <i>Bulnesol</i>               |        |    |        |        |        |
| Model                         | 10.49  | 5  | 2.10   | 5.76   | 0.0201 |
| X <sub>1</sub>                | 9.15   | 1  | 9.15   | 25.11  | 0.0015 |
| X <sub>2</sub>                | 0.0067 | 1  | 0.0067 | 0.0184 | 0.8959 |
| X <sub>1</sub> <sup>2</sup>   | 0.1296 | 1  | 0.1296 | 0.3556 | 0.5697 |
| X <sub>2</sub> <sup>2</sup>   | 0.7073 | 1  | 0.7073 | 1.94   | 0.2062 |
| X <sub>1</sub> X <sub>2</sub> | 0.6530 | 1  | 0.6530 | 1.79   | 0.2225 |

|                        |        |    |        |      |        |
|------------------------|--------|----|--------|------|--------|
| Residual               | 2.55   | 7  | 0.3644 |      |        |
| Lack of fit            | 2.05   | 3  | 0.6836 | 5.47 | 0.0672 |
| Pure error             | 0.5001 | 4  | 0.1250 |      |        |
| Cor total              | 13.04  | 12 |        |      |        |
| R <sup>2</sup> =0.8044 |        |    |        |      |        |

---

\* X<sub>1</sub>: extraction pressure; X<sub>2</sub>: temperature  
 $p \geq 0.05$  not significant.

**Table S3.** Analysis of variance (ANOVA) for the response surface quadratic models for CBD and CBDA.

| Source                        | Sum of squares | df | Mean square | F-value | <i>p</i> -value* |
|-------------------------------|----------------|----|-------------|---------|------------------|
| <i>CBD</i>                    |                |    |             |         |                  |
| Model                         | 27.07          | 5  | 5.41        | 17.00   | 0.0009           |
| X <sub>1</sub>                | 2.48           | 1  | 2.48        | 7.79    | 0.0269           |
| X <sub>2</sub>                | 10.66          | 1  | 10.66       | 33.48   | 0.0007           |
| X <sub>1</sub> <sup>2</sup>   | 0.3306         | 1  | 0.3306      | 1.04    | 0.3422           |
| X <sub>2</sub> <sup>2</sup>   | 12.36          | 1  | 12.36       | 38.81   | 0.0004           |
| X <sub>1</sub> X <sub>2</sub> | 0.4159         | 1  | 0.4159      | 1.31    | 0.2907           |
| Residual                      | 2.23           | 7  | 0.3185      |         |                  |
| Lack of fit                   | 1.68           | 3  | 0.5609      | 4.10    | 0.1031           |
| Pure error                    | 0.5467         | 4  | 0.1367      |         |                  |
| Cor total                     | 29.30          | 12 |             |         |                  |
| R <sup>2</sup> =0.9239        |                |    |             |         |                  |
| <i>CBDA</i>                   |                |    |             |         |                  |
| Model                         | 762.17         | 5  | 152.43      | 8.37    | 0.0072           |
| X <sub>1</sub>                | 648.40         | 1  | 648.40      | 35.59   | 0.0006           |
| X <sub>2</sub>                | 18.66          | 1  | 18.66       | 1.02    | 0.3452           |
| X <sub>1</sub> <sup>2</sup>   | 4.75           | 1  | 4.75        | 0.2609  | 0.6252           |
| X <sub>2</sub> <sup>2</sup>   | 66.76          | 1  | 66.76       | 3.66    | 0.0971           |
| X <sub>1</sub> X <sub>2</sub> | 34.61          | 1  | 34.61       | 1.90    | 0.2106           |
| Residual                      | 127.52         | 7  | 18.22       |         |                  |
| Lack of fit                   | 80.55          | 3  | 26.85       | 2.29    | 0.2206           |
| Pure error                    | 46.97          | 4  | 11.74       |         |                  |
| Cor total                     | 889.69         | 12 |             |         |                  |
| R <sup>2</sup> =0.8567        |                |    |             |         |                  |

**Table S4.** Analysis of variance (ANOVA) for the response surface quadratic models for antioxidant and antibacterial activity.

| Source                        | Sum of squares | df | Mean square | F-value | <i>p</i> -value* |
|-------------------------------|----------------|----|-------------|---------|------------------|
| <i>DPPH</i>                   |                |    |             |         |                  |
| Model                         | 134.67         | 5  | 26.93       | 5.93    | 0.0185           |
| X <sub>1</sub>                | 81.11          | 1  | 81.11       | 17.87   | 0.0039           |
| X <sub>2</sub>                | 0.6904         | 1  | 0.6904      | 0.1521  | 0.7081           |
| X <sub>1</sub> <sup>2</sup>   | 0.6241         | 1  | 0.6241      | 0.1375  | 0.7217           |
| X <sub>2</sub> <sup>2</sup>   | 51.99          | 1  | 51.99       | 11.45   | 0.0117           |
| X <sub>1</sub> X <sub>2</sub> | 2.09           | 1  | 2.09        | 0.4616  | 0.5187           |
| Residual                      | 31.77          | 7  | 4.54        |         |                  |
| Lack of fit                   | 25.80          | 3  | 8.60        | 5.77    | 0.0619           |
| Pure error                    | 5.97           | 4  | 1.49        |         |                  |
| Cor total                     | 166.44         | 12 |             |         |                  |
| R <sup>2</sup> =0.8091        |                |    |             |         |                  |
| <i>MIC ( B. subtilis)</i>     |                |    |             |         |                  |
| Model                         | 620.02         | 5  | 124.00      | 5.05    | 0.0280           |
| X <sub>1</sub>                | 188.85         | 1  | 188.85      | 7.70    | 0.0275           |
| X <sub>2</sub>                | 209.24         | 1  | 209.24      | 8.53    | 0.0223           |
| X <sub>1</sub> <sup>2</sup>   | 68.56          | 1  | 68.56       | 2.79    | 0.1385           |
| X <sub>2</sub> <sup>2</sup>   | 4.25           | 1  | 4.25        | 0.1732  | 0.6898           |
| X <sub>1</sub> X <sub>2</sub> | 140.15         | 1  | 140.15      | 5.71    | 0.0482           |
| Residual                      | 171.75         | 7  | 24.54       |         |                  |
| Lack of fit                   | 31.65          | 3  | 10.55       | 0.3012  | 0.8241           |
| Pure error                    | 140.10         | 4  | 35.03       |         |                  |
| Cor total                     | 791.78         | 12 |             |         |                  |
| R <sup>2</sup> =0.7831        |                |    |             |         |                  |

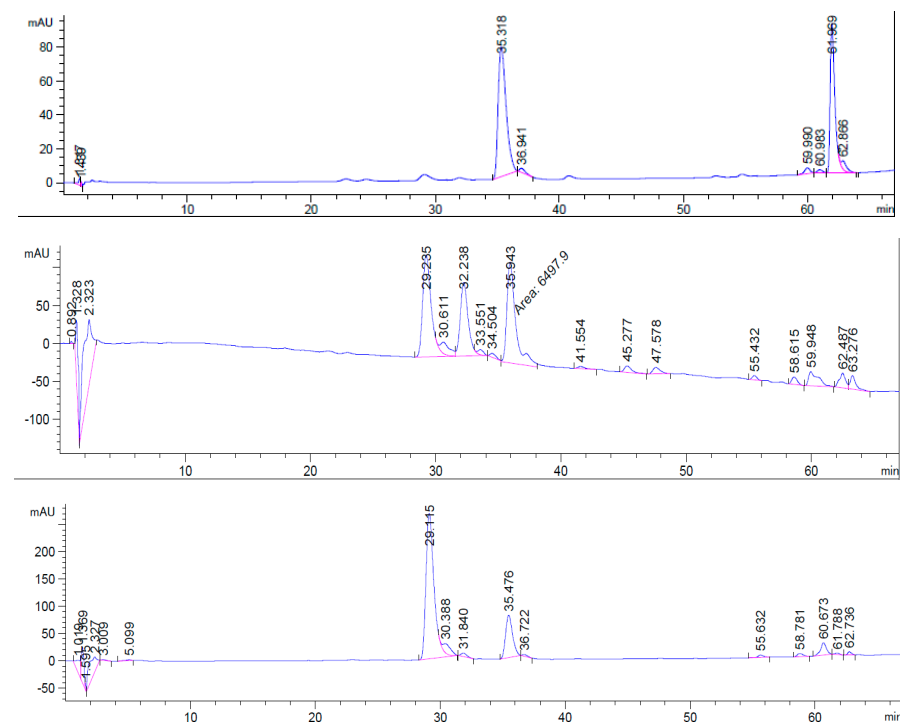

**Figure S1.** Representative chromatogram of the HPLC analysis of the extracts number 4; upper chromatogram at 250 nm – CBCA at 62.735 min; mean chromatogram at 210 nm – CBG at 33.243 min, THC at 47.578 min; lower chromatogram at 230 nm – CBD at 31.840 min, CBDA at 35.476 min, CBC at 55.632 min and THCA at 60.673 min.
